# Supplementary material for: Temporal Genetic Dynamics of an Experimental, Biparental Field Population of Phytophthora capsici
Source: PubMed Central journal article supplement (PMC5347166; doi:10.3389/fgene.2017.00026), 2017-03-13
Supplement: Data_Sheet_4.pdf [file Data_Sheet_4.pdf]

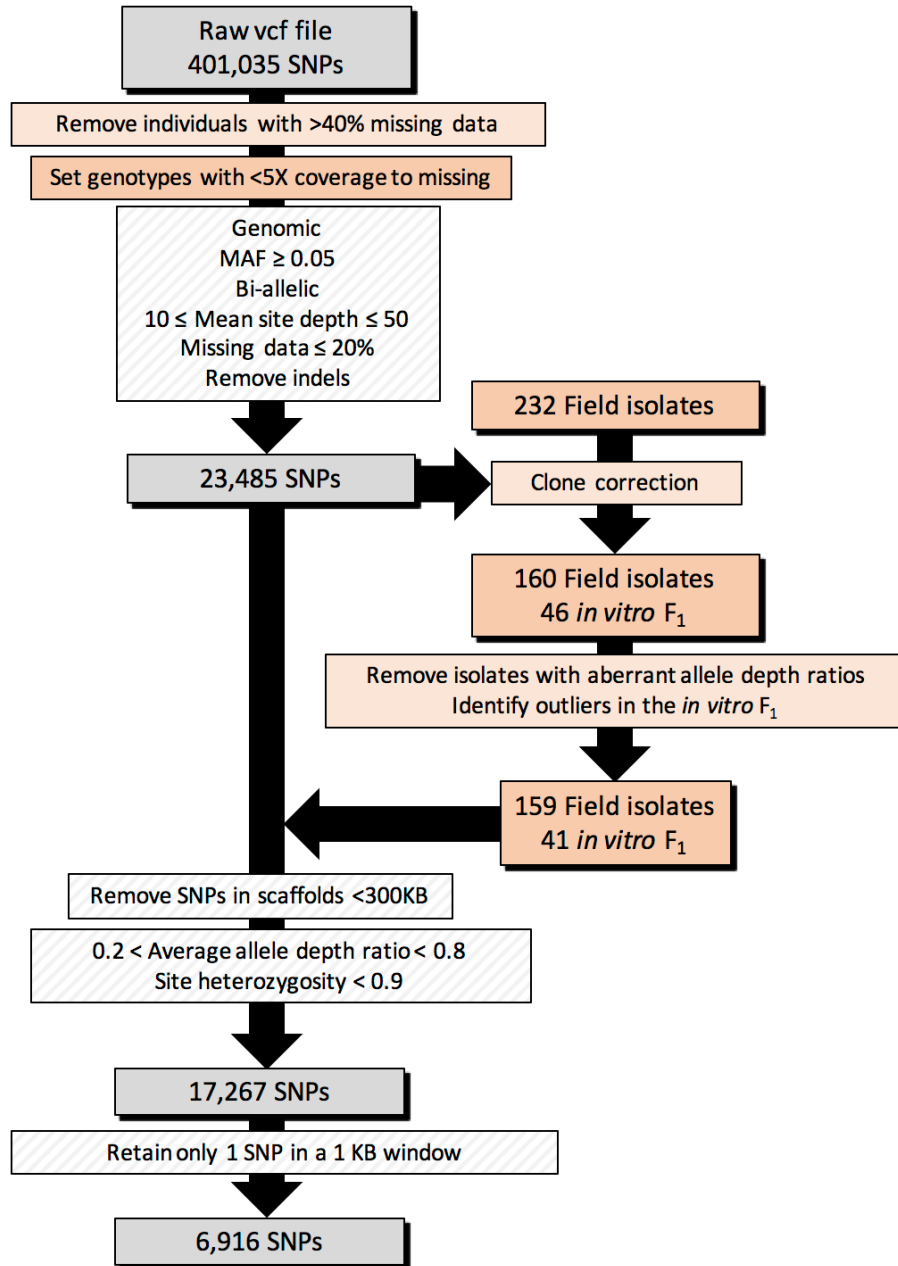

**Figure S1. SNP and individual filtering pipeline.** Gray and white shaded boxes indicate SNP filtering steps. Orange shaded boxes indicate individual filtering steps.

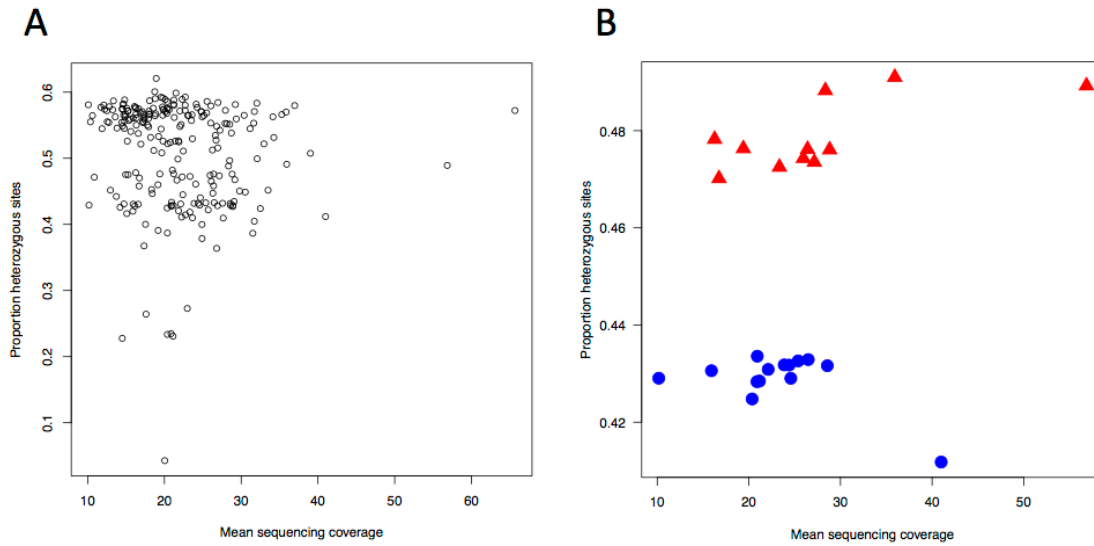

**Figure S2. Relationship between sequencing coverage and heterozygosity.** The proportion of heterozygous genotypes per sample plotted against individual mean sequencing coverage ( $n=23,485$  SNPs). A) For all samples prior to clone-correction and outlier removal; and B) for only replicates of the A1 parental isolate ( $n=14$ ; blue circles) and the A2 parental isolate ( $n=11$ ; red triangles).

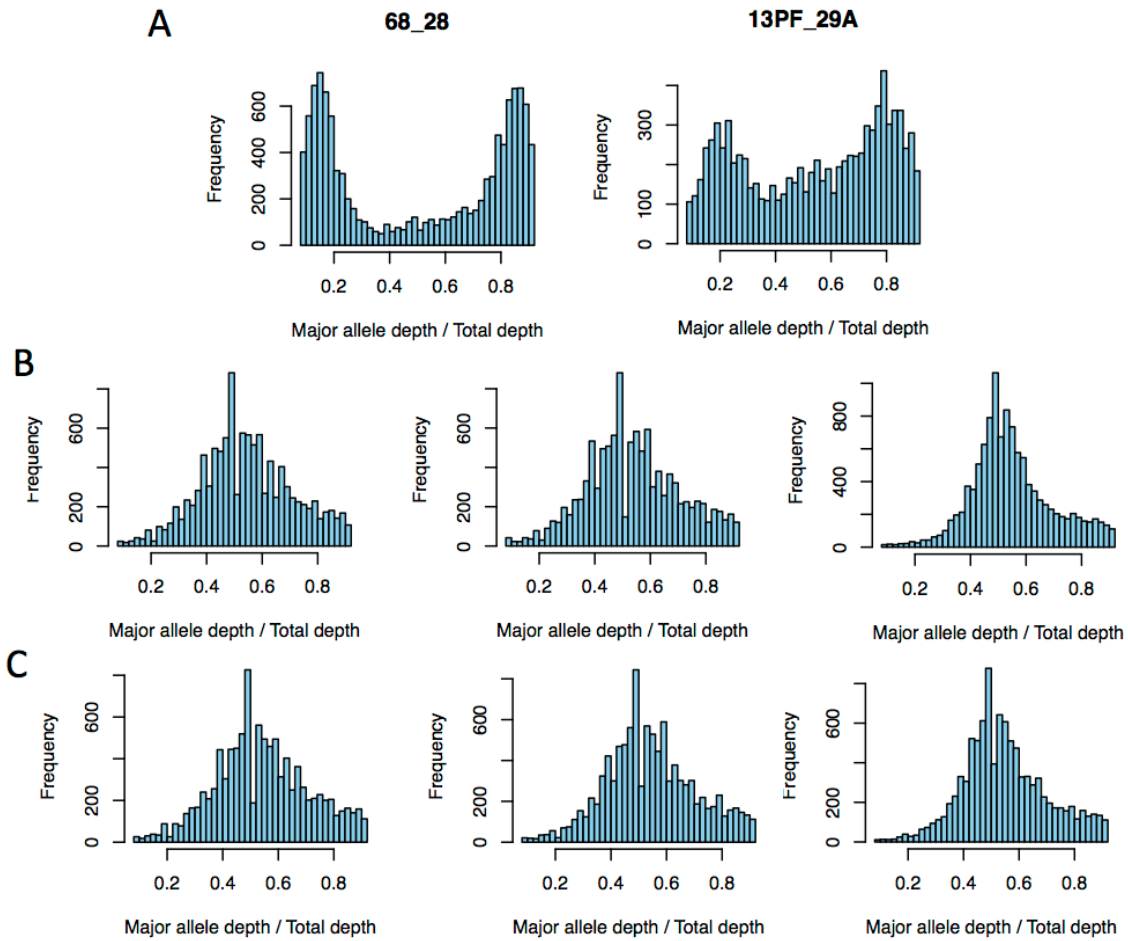

**Figure S3. Skewed allele depth ratios in two isolates suggest ploidy variation.** Histograms of the ratio of the major allele depth to the total depth for each heterozygous genotype for each isolate (at 23,485 SNPs). A) One *in vitro* and one field isolate display grossly aberrant allele depth ratios suggestive of ploidy variation. In contrast, allele depth ratios for the (B) A1 and (C) A2 parental isolates (three replicates each) were centered at approximately 0.5.

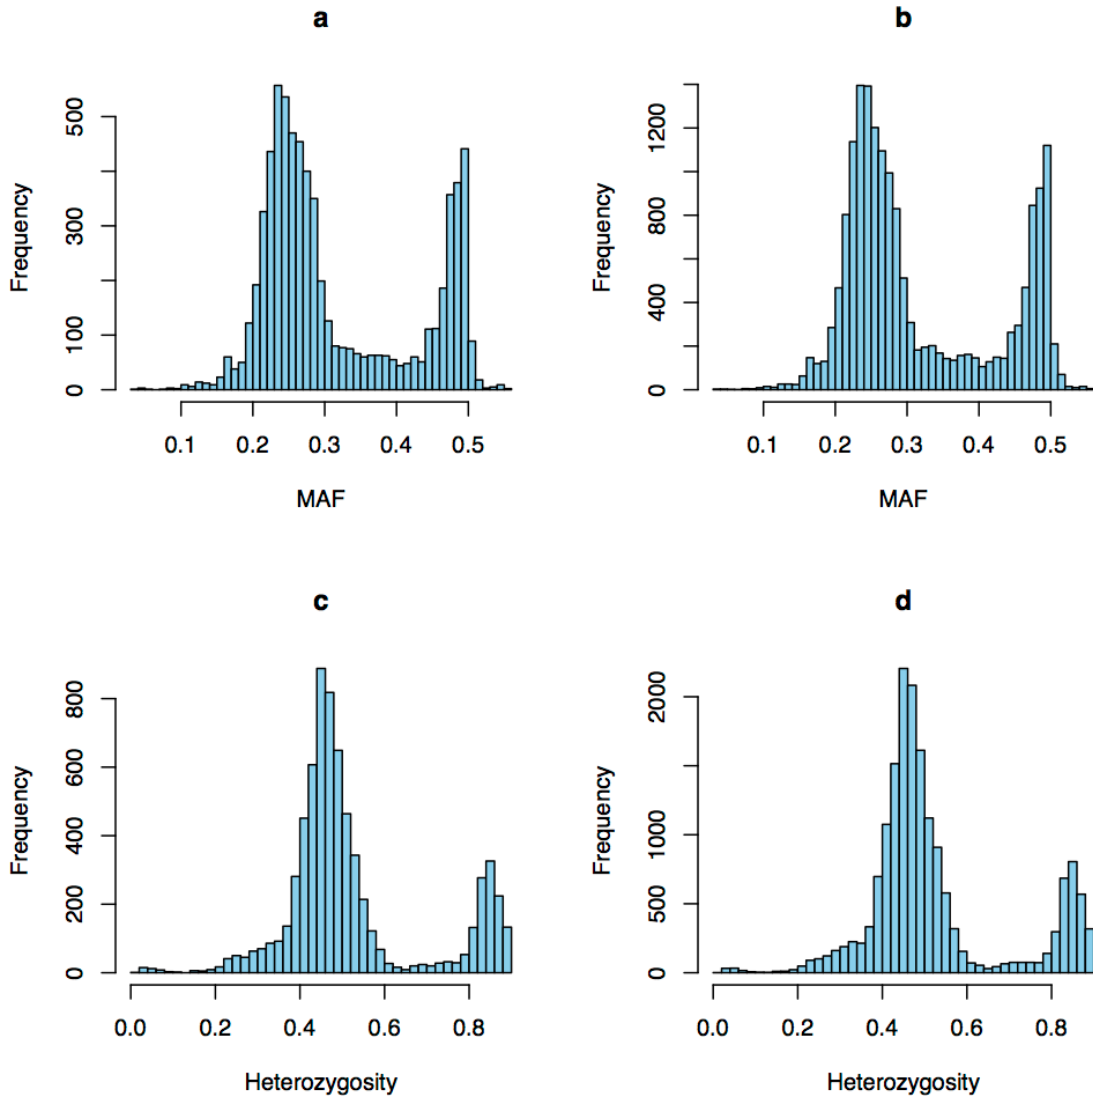

**Figure S4. Comparing pruned and unpruned data sets.** Minor allele frequency (MAF) and heterozygosity distributions for the unpruned ( $n=17,267$ ) and pruned SNPs ( $n=6,916$ ) in the field population ( $n=159$  isolates). (A) and (C) are for the pruned data set. (B) and (D) are for the unpruned data set.

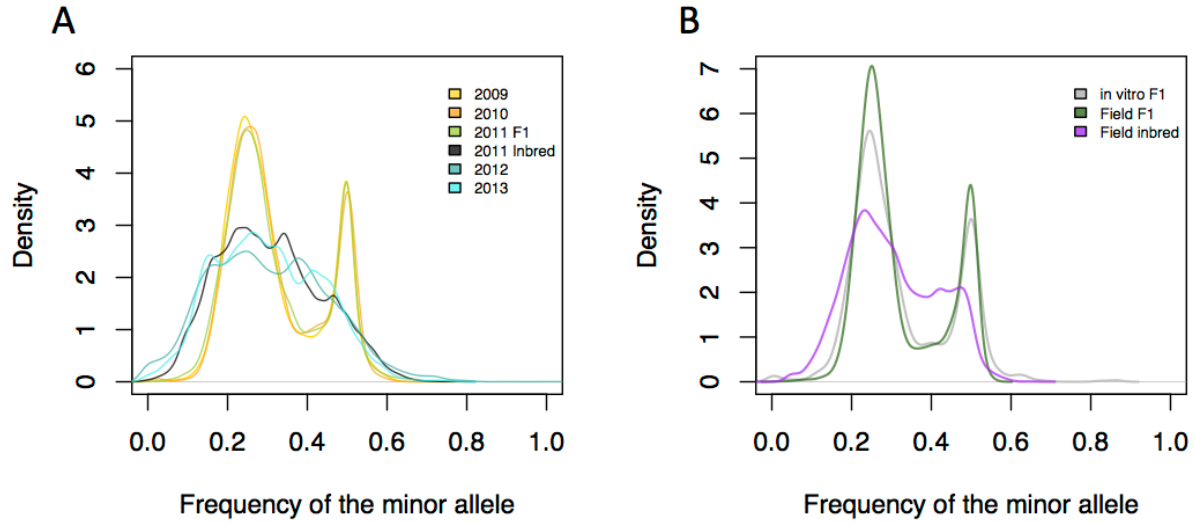

**Figure S5. Minor allele frequency (MAF) distributions for the field and *in vitro* populations.** A) MAF distributions for each year in the field population. Within years containing F<sub>1</sub> isolates, we observe peaks at 0.25 and 0.5, consistent with expectations for a population derived from only two parents. The MAF distribution of F<sub>1</sub> isolates in 2011 was similar to the MAF distributions in 2009 and 2010, years which contained exclusively F<sub>1</sub> isolates. B) The field F<sub>1</sub> subpopulation MAF distribution was consistent with the that of the *in vitro* F<sub>1</sub>. The field inbred MAF distribution deviated from expectations for an F<sub>1</sub>, denoting allele frequency changes.

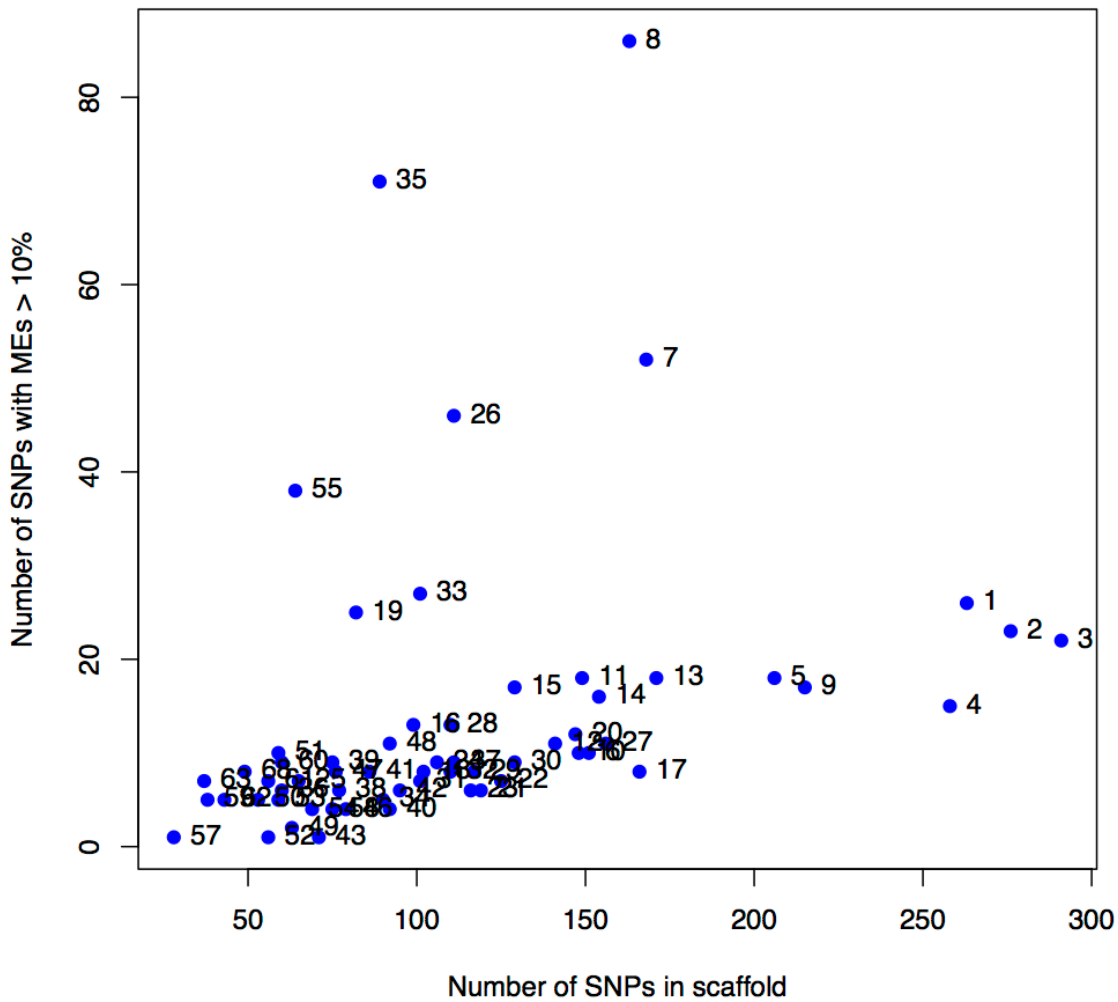

**Figure S6. Relationship between number of SNPs in each scaffold and the incidence of Mendelian error (ME) enriched SNPs among the *in vitro* F<sub>1</sub> and empirically defined field F<sub>1</sub> (*n*=143) prior to removal of ME enriched SNPs.** SNPs enriched for MEs were defined as SNPs where greater than 10% of *in vitro* F<sub>1</sub> and field F<sub>1</sub> isolates had a ME (at least 15 isolates). The number of ME enriched SNPs was plotted as a function of the number of SNPs in each scaffold, identifying seven scaffolds (7, 8, 19, 26, 33, 35, and 55) with excess ME-enriched SNPs relative to the other scaffolds. Data points are labeled with the scaffold number.

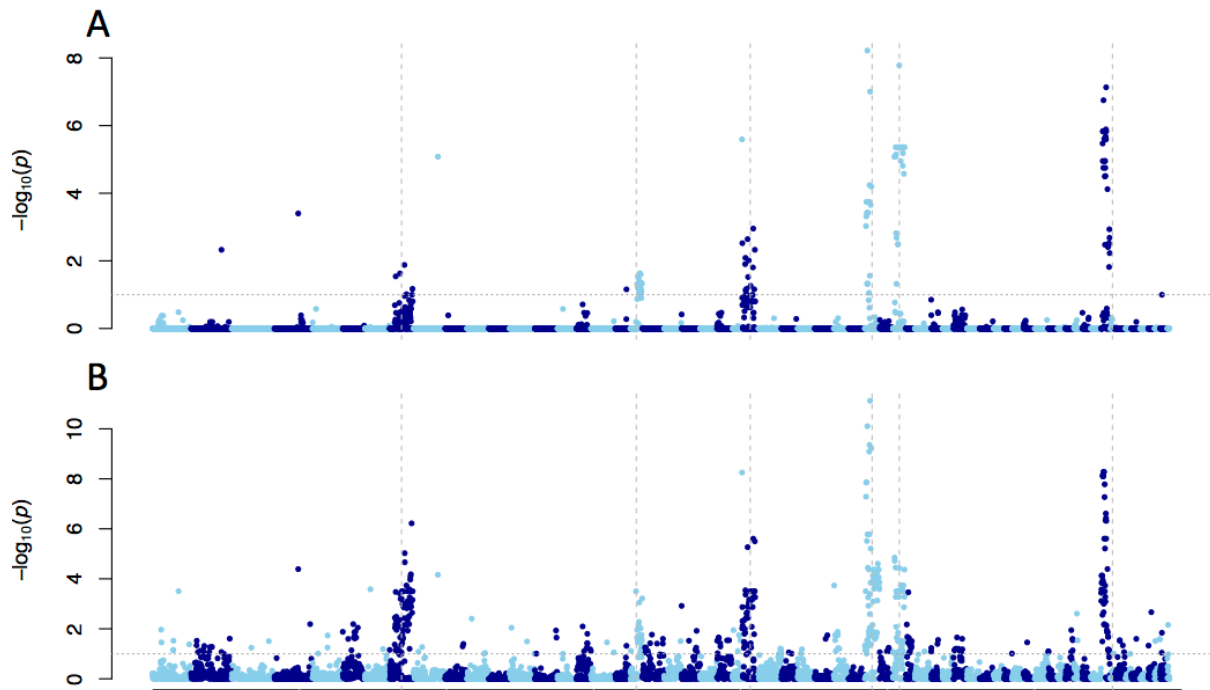

**Figure S7. Regions of differentiation between the *in vitro* F<sub>1</sub> and the field F<sub>1</sub> and field inbred subpopulations identified using Fisher's exact tests of allele frequency differences at each SNP.** Negative log<sub>10</sub>-transformed, false-discovery rate (FDR) adjusted *P*-values from pairwise comparisons between the (A) *in vitro* F<sub>1</sub> and field F<sub>1</sub>; and (B) *in vitro* F<sub>1</sub> and field inbred plotted for each SNP. SNPs are ordered relative to physical position and colors alternate by scaffold. Gray vertical dashed lines in A-C indicate scaffolds pertaining to regions of differentiation between the *in vitro* F<sub>1</sub> and the field F<sub>1</sub>. The gray dotted line in A and B denotes the 10% FDR threshold.

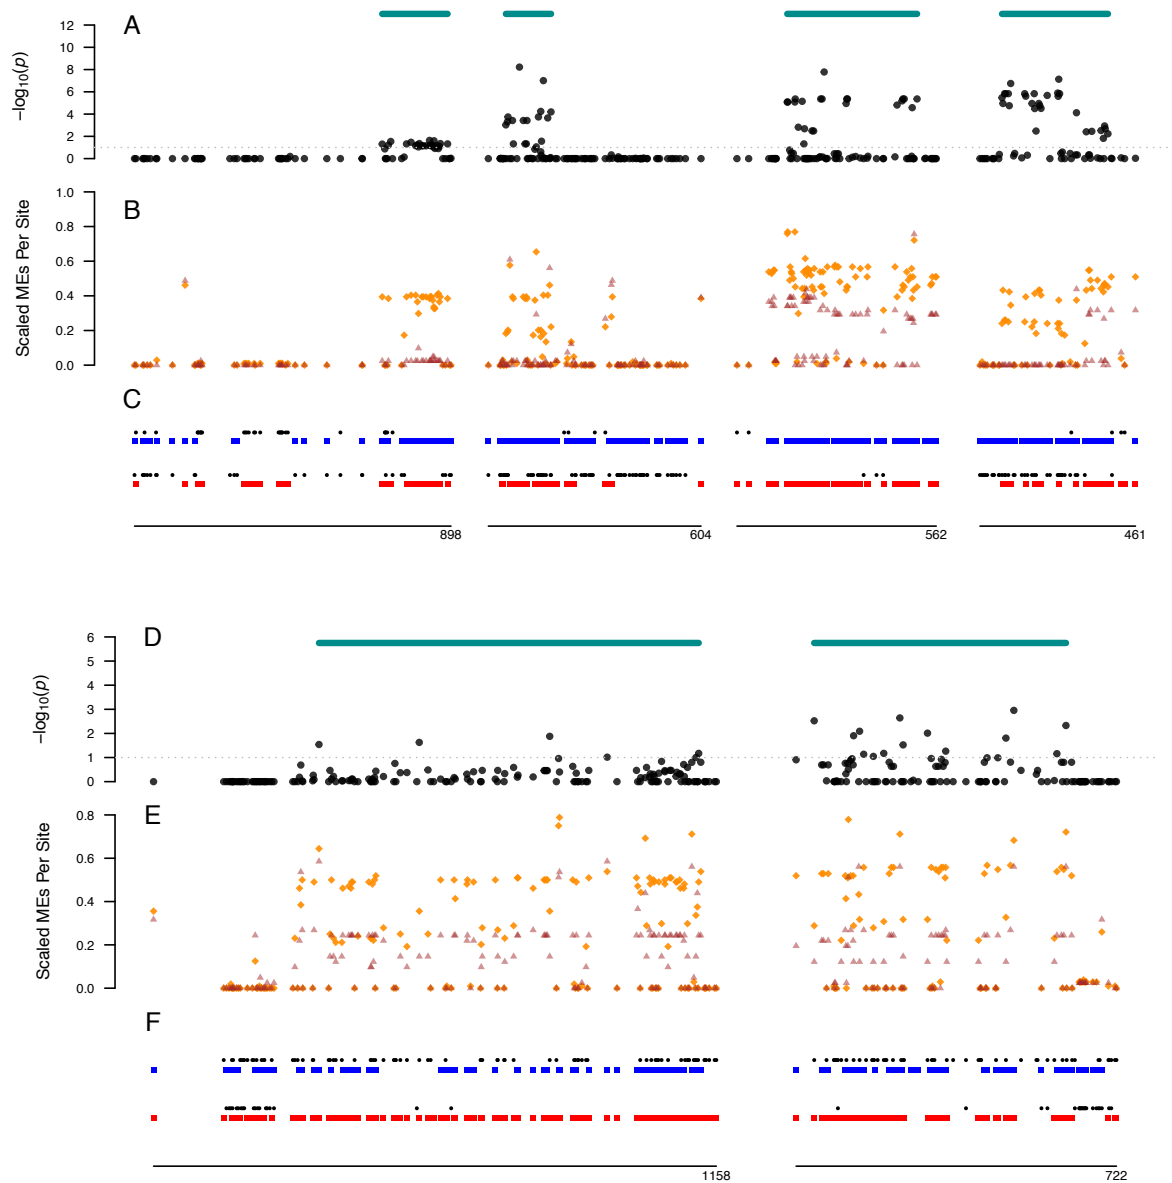

**Figure S8. Regions of differentiation between the *in vitro* F<sub>1</sub> and field F<sub>1</sub> were associated with loss of heterozygosity (LOH) events in the parental cultures.** A) and D) show the negative log<sub>10</sub>-transformed, FDR adjusted *P*-values from the Fisher's exact test of allele frequency differences between the *in vitro* F<sub>1</sub> and field F<sub>1</sub>, relative to physical position (kb), in scaffolds corresponding to regions of differentiation. The teal bars span each differentiated region. B) and E) show the proportion of individuals with a Mendelian error (ME) for each SNP in the *in vitro* F<sub>1</sub> (brown triangles) and the field F<sub>1</sub> (orange diamonds), excluding homozygous isolates. C) and F) are the parental genotypes represented by blue (A1 parent) and red (A2 parent) squares for homozygous genotypes and black dots for heterozygous genotypes. A-C show, in order, scaffolds 19, 33, 35, and 55. And, D-F show, in order, scaffolds 8 and 26.



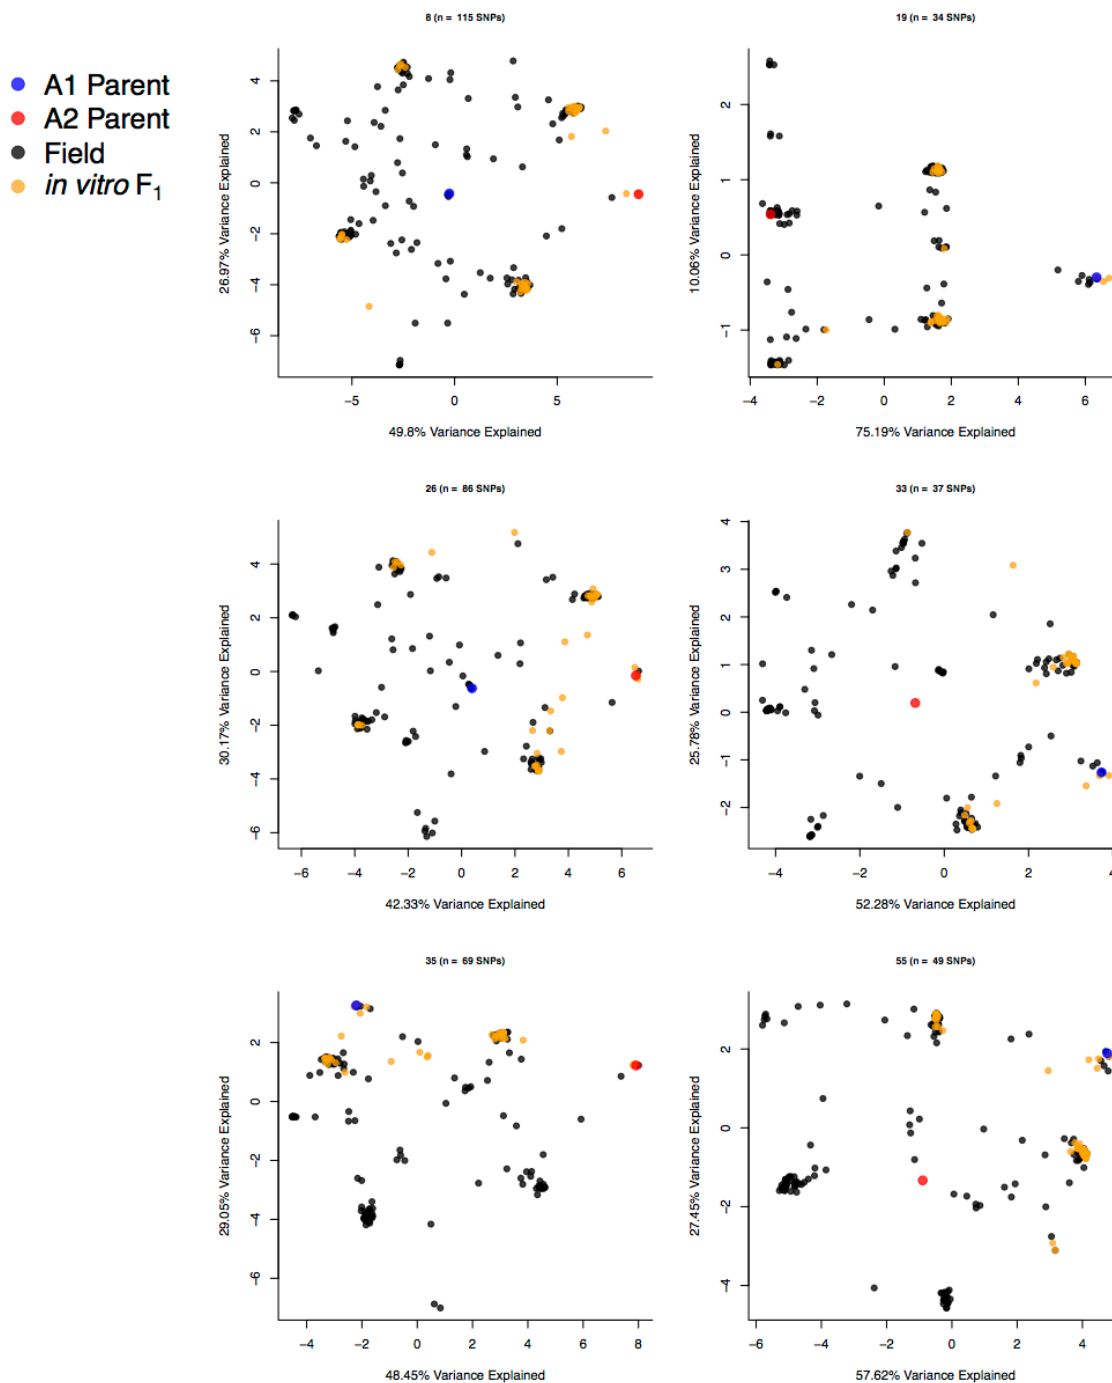

**Figure S9. Principal component analysis (PCA) in scaffolds pertaining to regions of interest (ROIs).** PCA was performed on the *in vitro* F<sub>1</sub>, field F<sub>1</sub>, and the field inbred isolates, as well as, the consensus parental genotypes with only SNPs in each of the six differentiated regions. All PCAs show four primary clusters, corresponding to four genotypic classes. The field isolates ( $n=159$ ) are represented by filled, black circles. The *in vitro* F<sub>1</sub> ( $n=41$ ) are represented by orange, filled circles. The A1 and A2 consensus parental genotypes are represented by blue and red filled circles, respectively.



**B**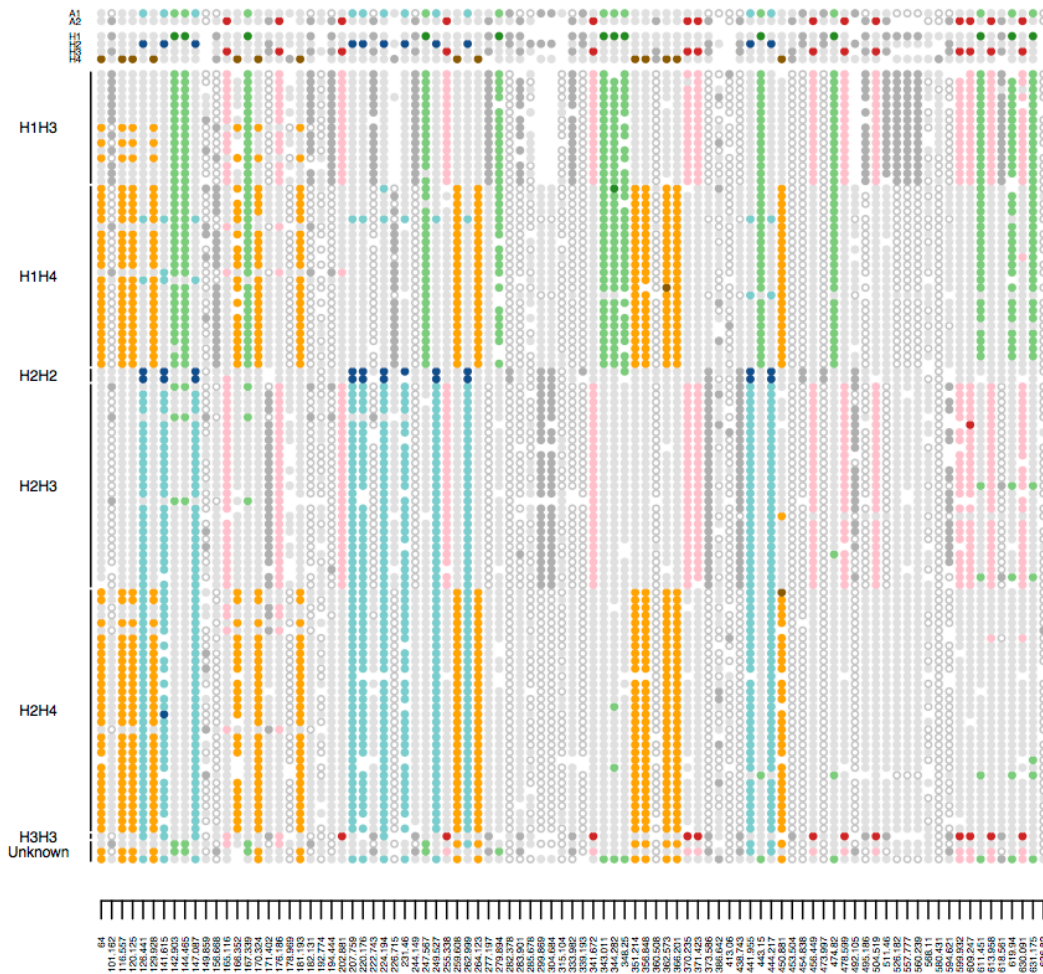

**Figure S10. Phase diagram for R-26 (scaffold 26).** Haplotype tagging SNPs were identified from the phased parental genotypes, and each isolate genotype was represented with respect to these tagging SNPs (see Methods). Filled, colored circles indicate haplotype tagging SNPs, with darker colors indicating the homozygote state, and lighter shades indicating the heterozygous state. Filled, gray circles indicate homozygous genotypes at non-tagging SNPs, whereas open, gray circles indicate heterozygous genotypes at non-tagging SNPs (see legend). A1 parental haplotypes are indicated by H1 and H2. A2 parental haplotypes are indicated by H3 and H4. Missing genotypes are denoted by the absence of a circle. Phase diagrams for the parental isolates (top), identified haplotypes (middle) and (A) *in vitro* F<sub>1</sub> and (B) field F<sub>1</sub>.

**A**

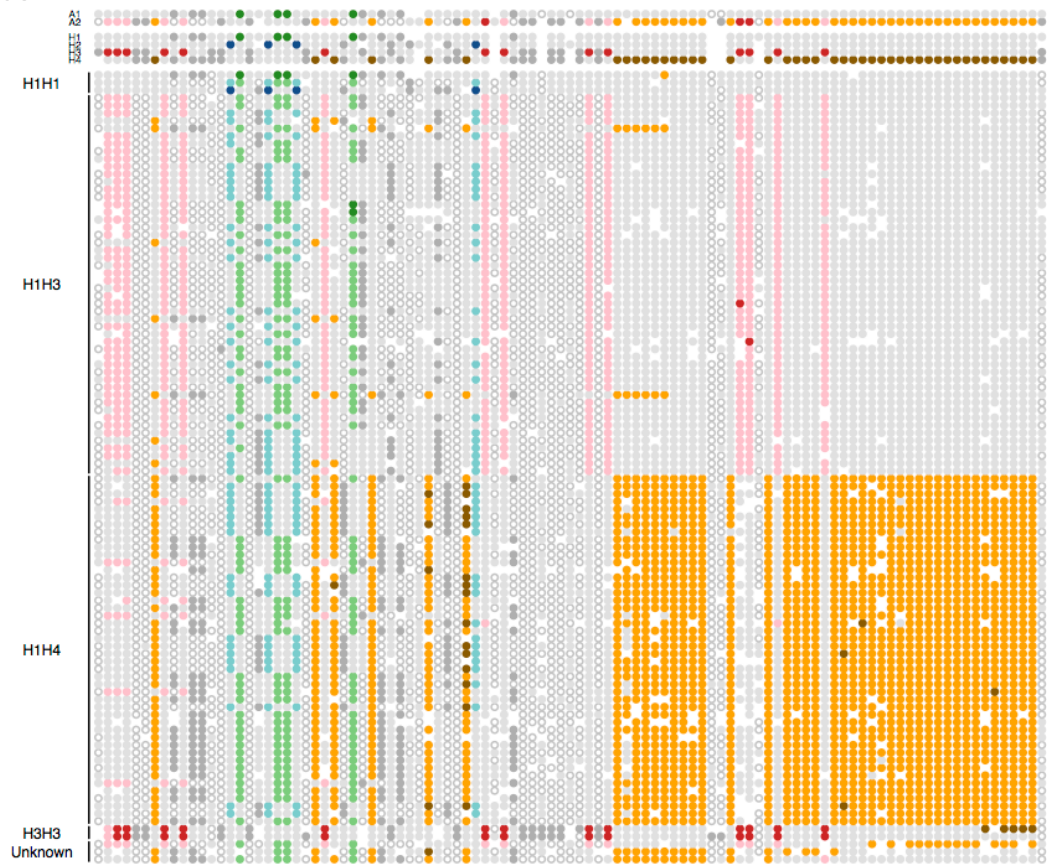

88  
 90  
 92  
 94  
 96  
 98  
 100  
 102  
 104  
 106  
 108  
 110  
 112  
 114  
 116  
 118  
 120  
 122  
 124  
 126  
 128  
 130  
 132  
 134  
 136  
 138  
 140  
 142  
 144  
 146  
 148  
 150  
 152  
 154  
 156  
 158  
 160  
 162  
 164  
 166  
 168  
 170  
 172  
 174  
 176  
 178  
 180  
 182  
 184  
 186  
 188  
 190  
 192  
 194  
 196  
 198  
 200  
 202  
 204  
 206  
 208  
 210  
 212  
 214  
 216  
 218  
 220  
 222  
 224  
 226  
 228  
 230  
 232  
 234  
 236  
 238  
 240  
 242  
 244  
 246  
 248  
 250  
 252  
 254  
 256  
 258  
 260  
 262  
 264  
 266  
 268  
 270  
 272  
 274  
 276  
 278  
 280  
 282  
 284  
 286  
 288  
 290  
 292  
 294  
 296  
 298  
 300  
 302  
 304  
 306  
 308  
 310  
 312  
 314  
 316  
 318  
 320  
 322  
 324  
 326  
 328  
 330  
 332  
 334  
 336  
 338  
 340  
 342  
 344  
 346  
 348  
 350  
 352  
 354  
 356  
 358  
 360  
 362  
 364  
 366  
 368  
 370  
 372  
 374  
 376  
 378  
 380  
 382  
 384  
 386  
 388  
 390  
 392  
 394  
 396  
 398  
 400  
 402  
 404  
 406  
 408  
 410  
 412  
 414  
 416  
 418  
 420  
 422  
 424  
 426  
 428  
 430  
 432  
 434  
 436  
 438  
 440  
 442  
 444  
 446  
 448  
 450  
 452  
 454  
 456  
 458  
 460  
 462  
 464  
 466  
 468  
 470  
 472  
 474  
 476  
 478  
 480  
 482  
 484  
 486  
 488  
 490  
 492  
 494  
 496  
 498  
 500  
 502  
 504  
 506  
 508  
 510  
 512  
 514  
 516  
 518  
 520  
 522  
 524  
 526  
 528  
 530  
 532  
 534  
 536  
 538  
 540  
 542  
 544  
 546  
 548  
 550  
 552  
 554  
 556  
 558  
 560  
 562  
 564  
 566  
 568  
 570  
 572  
 574  
 576  
 578  
 580  
 582  
 584  
 586  
 588  
 590  
 592  
 594  
 596  
 598  
 600

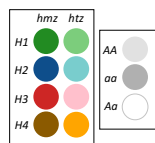



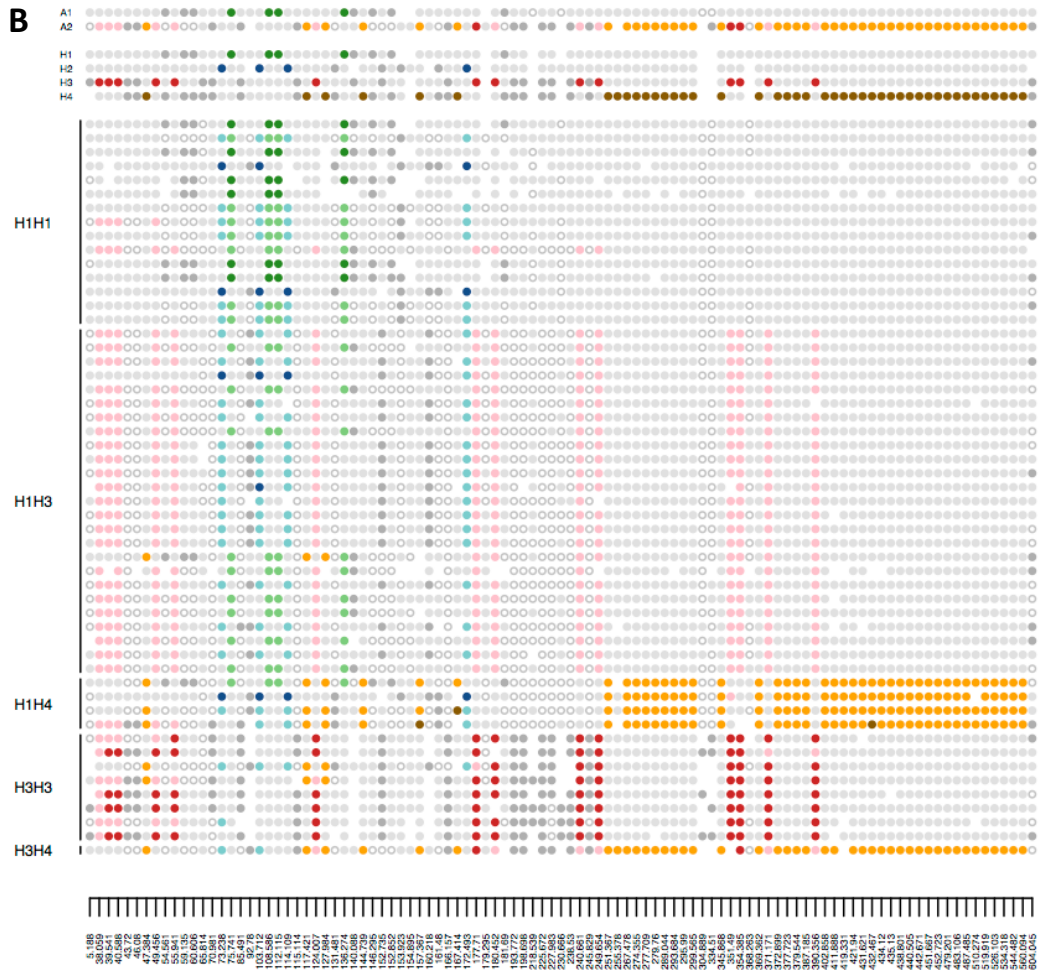

**Figure S11. Phase diagram for ROI-1 (scaffold 33).** Labeled genotypes based on ROI-1 only. Haplotype tagging SNPs were identified from the phased parental genotypes, and each isolate genotype was characterized with respect to the tagging SNPs (see Methods). Filled, colored circles indicate haplotype tagging SNPs, with darker colors indicating the homozygote state, and lighter shades indicating the heterozygous state. Filled, gray circles indicate homozygous, non-tagging genotypes, whereas open, gray circles indicate heterozygous non-tagging genotypes (see legend). Missing genotypes are denoted by the absence of a circle. A1 parental haplotypes are indicated by H1 and H2. A2 parental haplotypes are indicated by H3 and H4. Phase diagrams for the parental isolates (top), identified haplotypes (middle) and (A) field F<sub>1</sub> and (B) field inbred (bottom).



**B**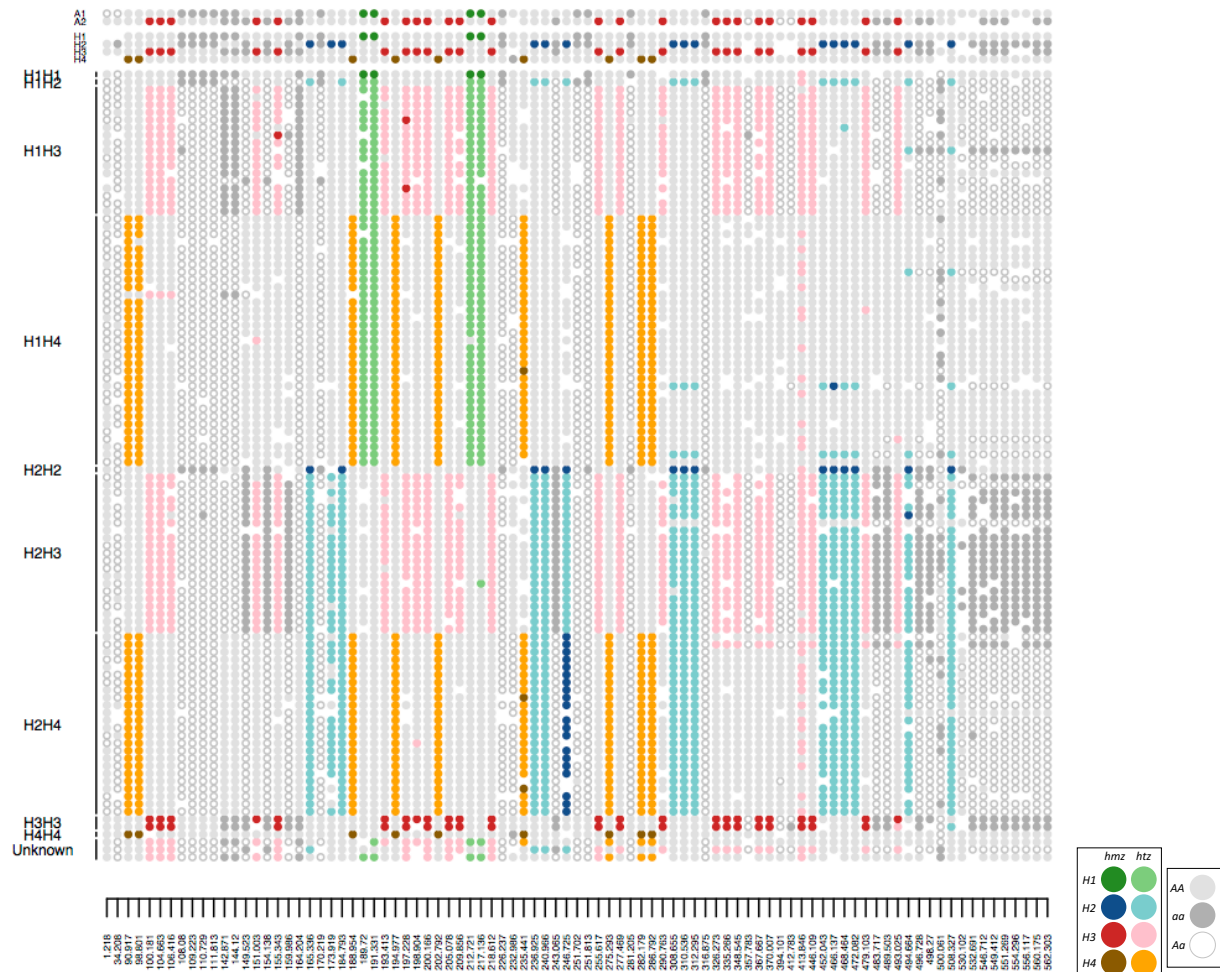

**Figure S12. Phase diagram for R-35 (scaffold 35).** Haplotype tagging SNPs were identified from the phased parental genotypes, and each isolate genotype was characterized with respect to the tagging SNPs (see Methods). Filled, colored circles indicate haplotype tagging SNPs, with darker colors indicating the homozygote state, and lighter shades indicating the heterozygous state. Filled, gray circles indicate homozygous, non-tagging genotypes, whereas open, gray circles indicate heterozygous non-tagging genotypes (see legend). A1 parental haplotypes are indicated by H1 and H2. A2 parental haplotypes are indicated by H3 and H4. Missing genotypes are denoted by the absence of a circle. Phase diagrams for the parental isolates (top), identified haplotypes (middle) and (A) *in vitro* F<sub>1</sub> (B) field F<sub>1</sub>.

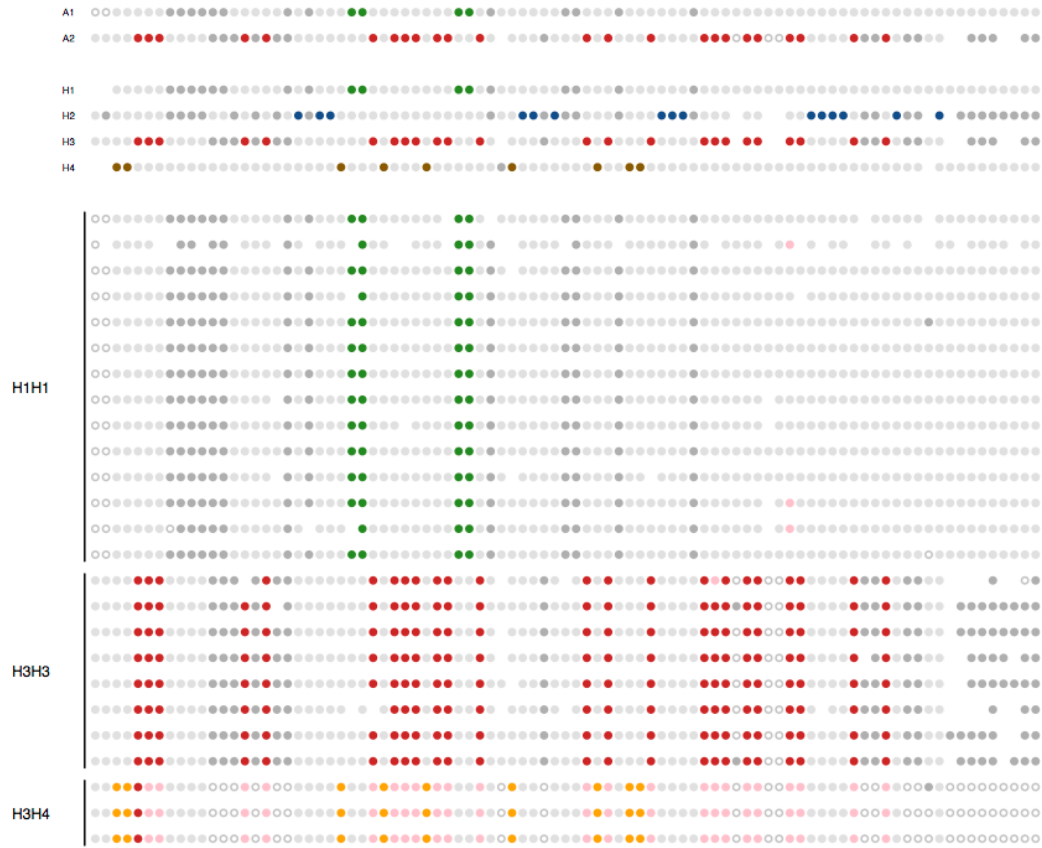

**Figure S13. Phase diagrams for the parental replicates in R-35 (scaffold 35).** All A1 parental replicates were H1/H1. The three A2 parental replicates sequenced prior to 2014 were H3/H4, whereas the later sequenced replicates were H3/H3 (see Supplementary Table S2). A1 parental haplotypes are indicated by H1 and H2. A2 parental haplotypes are indicated by H3 and H4.



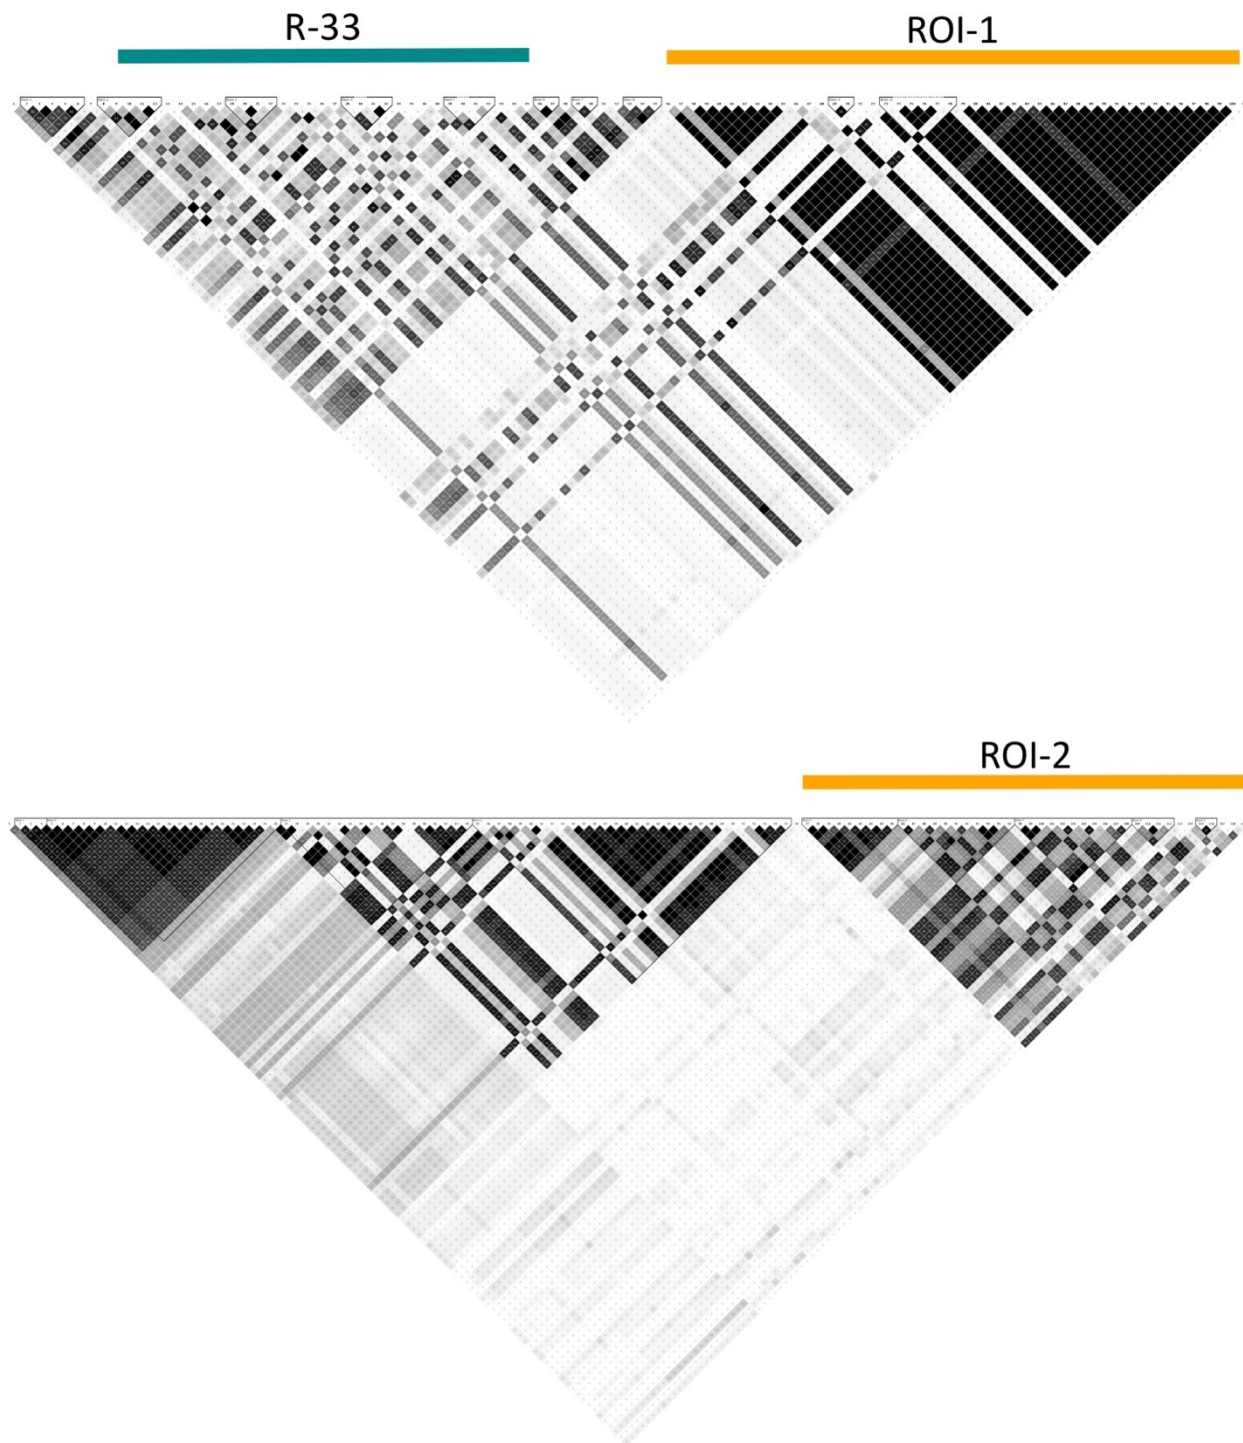

**Figure S14. Linkage disequilibrium (LD) in regions of interest (ROIs).** ROIs are indicated by orange bars. A) LD in scaffold 33 which contains both R-33 (denoted by a teal bar) and ROI-1. B) LD in scaffold 26, which contains ROI-2.

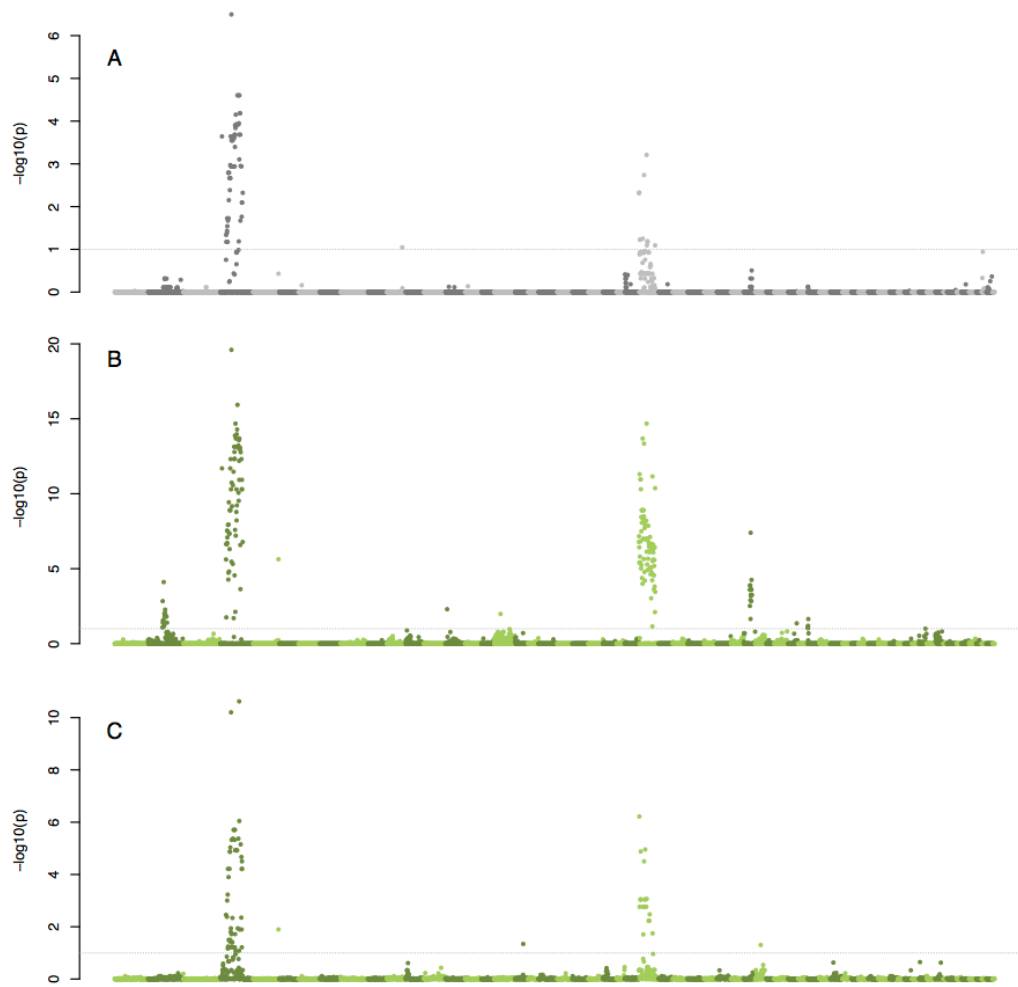

**Figure S15. Allele frequency differences between isolates of opposite mating types in the *in vitro* F<sub>1</sub>, field F<sub>1</sub>, and field inbred subpopulations.** Negative log<sub>10</sub>-transformed, false-discovery rate (FDR) corrected *P*-values ordered by scaffold and physical position, from the Fisher's exact test of allele frequency differences between A1 and A2 isolates in the (A) *in vitro* F<sub>1</sub>, (B) field F<sub>1</sub>, and (C) field inbred subpopulations. SNPs above the gray lines in A-C were significant at a 10% FDR threshold.

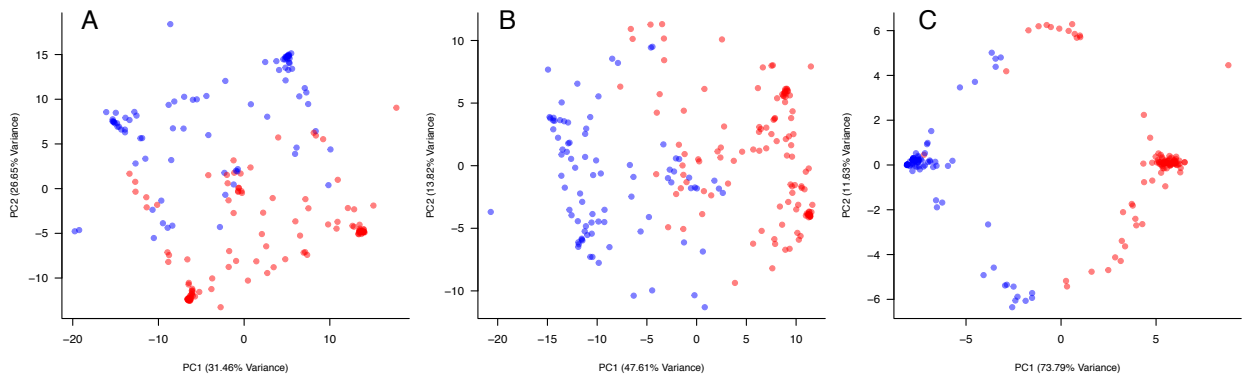

**Figure S16. Principal component analysis (PCA) in the mating type region (MTR).** PCA of all *in vitro* and field isolates using the: A) 293 SNPs in the MTR; B) 184 significantly differentiated SNPs in the field F<sub>1</sub>; and the C) 51 SNPs significantly differentiated in both the field F<sub>1</sub> and inbred subpopulations.

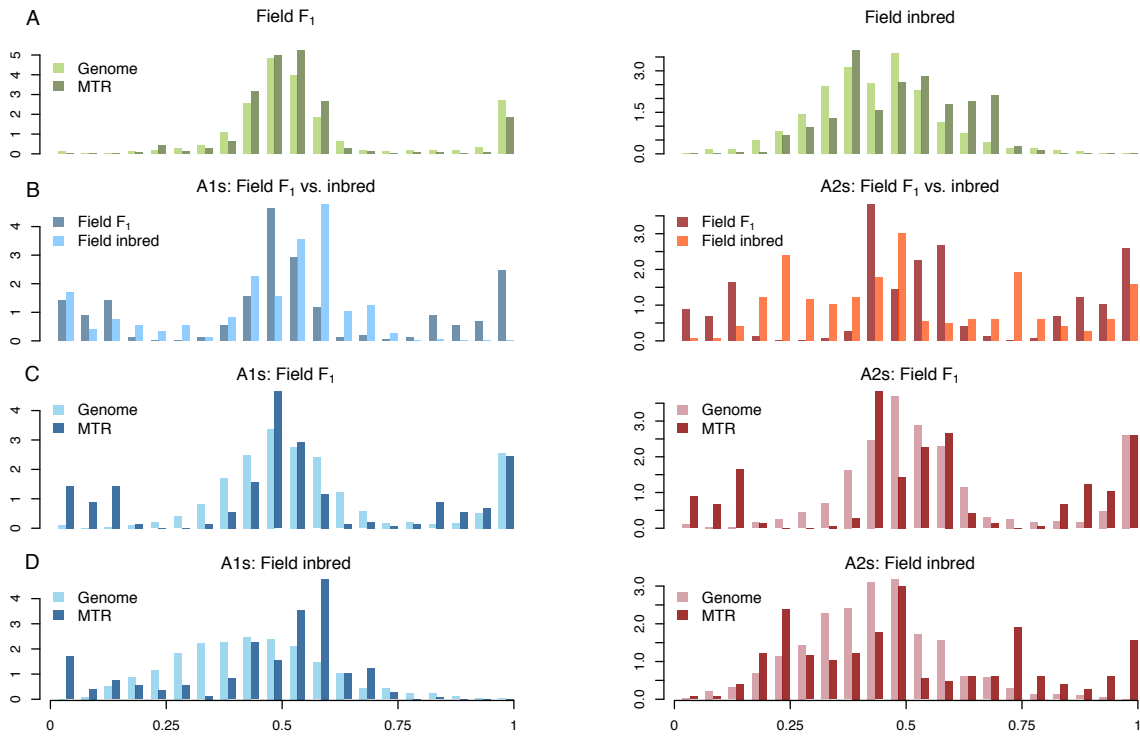

**Figure S17. Heterozygosity in the mating type region (MTR) compared to the rest of the genome.** Histograms of SNP heterozygosity in the MTR relative to the genome, represented by density distributions, for the: A) field F<sub>1</sub> and field inbred isolates; B) A1 and A2 field F<sub>1</sub> vs. field inbred isolates in the MTR; C) A1 and A2 field F<sub>1</sub> isolates in the MTR relative to the genome; and D) A1 and A2 field inbred isolates in the MTR relative to the genome.

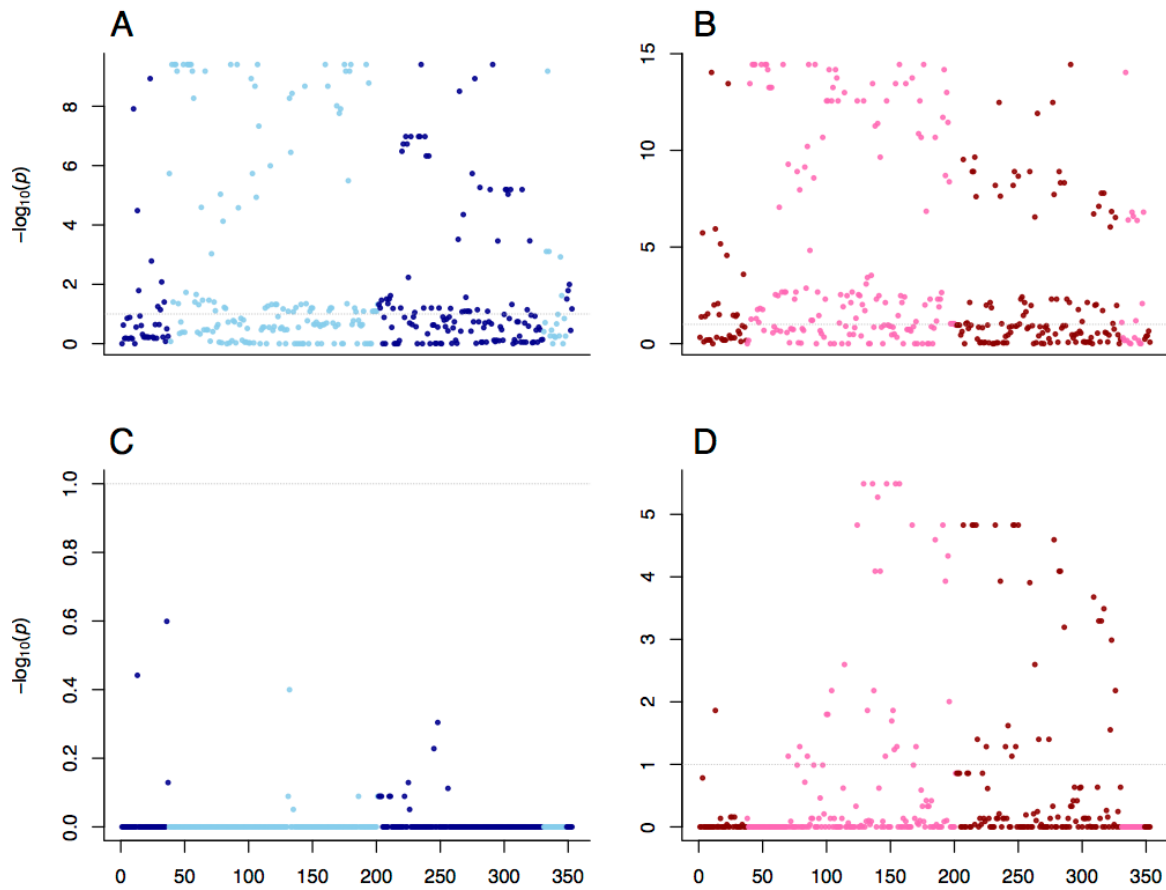

**Figure S18. Heterozygote excess in the mating type associated sub-regions.** Exact test of heterozygote excess in all five mating type associated sub-regions ( $n=353$  SNPs), ordered by scaffold (2, 4, 27, 34, and 40) and position within scaffold. For: A) A1 field  $F_1$  isolates; B) A2 field  $F_1$  isolates; C) A1 field inbred isolates; and D) A2 field inbred isolates.
